# Supplementary material
Source: PubMed Central journal article supplement (PMC6787912)
Supplement: NIHMS1528424-supplement-Supplemental_Material.pdf [file NIHMS1528424-supplement-Supplemental_Material.pdf]

## **SUPPLEMENTAL MATERIAL**

- Table I. Association of hemodynamic variables with functional outcome by institution
- Table II. Hemodynamic variables and site of occlusion
- Table III. Association of hemodynamic variables with functional outcome for the subpopulation of reperfused patients (TICI 2B or 3)
- Table IV. Association of hemodynamic variables with functional outcome after adjusting for initial core volume (CBF<30%)
- Table V. Baseline characteristics by institution
- Table VI. Comparison of hemodynamic variables in patients with general anesthesia and conscious sedation
- Table VII. Association of hemodynamic variables with functional outcome for procedural blood pressure baseline
- Table VIII. Comparison of hemodynamic variables using admission and pre-procedural blood pressure baseline
- Table IX. Comparison of patients with and without 90-day follow-up
- Table X. Hemodynamic variables and associations with outcome by blood pressure measurement type

| <b>Table I. Association of hemodynamic variables with functional outcome by institution</b> |      |           |         |      |           |         |
|---------------------------------------------------------------------------------------------|------|-----------|---------|------|-----------|---------|
| <b>University of Iowa</b>                                                                   |      |           |         |      |           |         |
| <b>Likelihood of a shift towards worse outcome on discharge mRS</b>                         |      |           |         |      |           |         |
| Variables                                                                                   | OR   | 95% CI    | p Value | aOR  | 95% CI    | p Value |
| $\Delta$ MAP, per 10-mmHg                                                                   | 1.20 | 1.06-1.37 | 0.006   | 1.14 | 1.00-1.30 | 0.056   |
| aMAP, per 300-mmHg*min                                                                      | 1.15 | 1.07-1.25 | <0.001  | 1.11 | 1.03-1.20 | 0.005   |
| <b>Likelihood of a shift towards worse outcome on 90-day mRS</b>                            |      |           |         |      |           |         |
| Variables                                                                                   | OR   | 95% CI    | p Value | aOR  | 95% CI    | p Value |
| $\Delta$ MAP, per 10-mmHg                                                                   | 1.22 | 1.08-1.39 | 0.002   | 1.17 | 1.02-1.32 | 0.020   |
| aMAP, per 300-mmHg*min                                                                      | 1.18 | 1.09-1.28 | <0.001  | 1.15 | 1.06-1.25 | <0.001  |
| <b>Yale-New Haven Hospital</b>                                                              |      |           |         |      |           |         |
| <b>Likelihood of a shift towards worse outcome on discharge mRS</b>                         |      |           |         |      |           |         |
| Variables                                                                                   | OR   | 95% CI    | p Value | aOR  | 95% CI    | p Value |
| $\Delta$ MAP, per 10-mmHg                                                                   | 1.18 | 1.07-1.31 | 0.001   | 1.15 | 1.03-1.27 | 0.012   |
| aMAP, per 300-mmHg*min                                                                      | 1.09 | 1.04-1.15 | <0.001  | 1.07 | 1.02-1.13 | 0.004   |
| <b>Likelihood of a shift towards worse outcome on 90-day mRS</b>                            |      |           |         |      |           |         |
| Variables                                                                                   | OR   | 95% CI    | p Value | aOR  | 95% CI    | p Value |
| $\Delta$ MAP, per 10-mmHg                                                                   | 1.22 | 1.07-1.40 | 0.003   | 1.24 | 1.07-1.43 | 0.003   |
| aMAP, per 300-mmHg*min                                                                      | 1.12 | 1.04-1.20 | 0.002   | 1.15 | 1.05-1.25 | 0.001   |

**Table I: Association of hemodynamic variables with functional outcome by institution.** aOR, adjusted odds ratio (adjusted for age, NIHSS and TICI score); OR, odds ratio; MAP, mean arterial pressure; mRS, modified Rankin scale;  $\Delta$ MAP, difference between baseline and lowest MAP during endovascular thrombectomy; aMAP, area between baseline and intraprocedural MAP; SBP, systolic blood pressure;  $\Delta$ SBP, difference between baseline and lowest SBP during endovascular thrombectomy; aSBP, area between baseline and intraprocedural SBP.

| <b>Table II. Hemodynamic variables and site of occlusion</b> |              |                 |               |               |               |                |
|--------------------------------------------------------------|--------------|-----------------|---------------|---------------|---------------|----------------|
|                                                              |              | <b>ICA/tICA</b> | <b>M1 MCA</b> | <b>M2 MCA</b> | <b>Tandem</b> | <b>p-value</b> |
| Total patients                                               | 390          |                 |               |               |               |                |
| Baseline SBP, mmHg $\pm$ SD                                  | 149 $\pm$ 26 | 151 $\pm$ 26    | 147 $\pm$ 25  | 156 $\pm$ 30  | 152 $\pm$ 23  | 0.066          |

|                                                                                          |             |          |          |          |          |       |
|------------------------------------------------------------------------------------------|-------------|----------|----------|----------|----------|-------|
| Baseline MAP, mmHg<br>± SD                                                               | 106 ±<br>19 | 104 ± 17 | 104 ± 20 | 110 ± 18 | 107 ± 16 | 0.208 |
| Mean minimum SBP,<br>mmHg ± SD                                                           | 113 ±<br>26 | 105 ± 25 | 114 ± 26 | 115 ± 26 | 111 ± 27 | 0.153 |
| Mean minimum MAP,<br>mmHg ± SD                                                           | 80 ±18      | 73 ± 17  | 80 ± 17  | 83 ± 17  | 79 ± 18  | 0.020 |
| Mean maximum SBP,<br>mmHg ± SD                                                           | 186 ±<br>31 | 184 ± 30 | 184 ± 30 | 186 ± 32 | 193 ± 34 | 0.277 |
| Mean maximum MAP,<br>mmHg ± SD                                                           | 132 ±<br>23 | 129 ± 19 | 130 ± 22 | 134 ± 27 | 137 ± 24 | 0.138 |
| Mean procedural SBP,<br>mmHg ± SD                                                        | 144 ±<br>19 | 143 ± 24 | 144 ± 18 | 145 ± 18 | 145 ± 22 | 0.939 |
| Mean procedural MAP,<br>mmHg ± SD                                                        | 100 ±<br>13 | 101 ± 16 | 100 ± 13 | 102 ± 12 | 101 ± 14 | 0.764 |
| Patients with intra-<br>procedural blood<br>pressure reduction<br>below admission, n (%) | 339<br>(87) |          |          |          |          |       |
| Mean SBP reduction,<br>mmHg ± SD                                                         | 44 ± 29     | 51 ± 35  | 40 ± 27  | 49 ± 31  | 46 ± 28  | 0.053 |
| Mean MAP reduction,<br>mmHg ± SD                                                         | 31 ± 20     | 35 ± 22  | 29 ± 20  | 33 ± 21  | 31 ± 19  | 0.401 |

|                                 |                |             |             |             |             |       |
|---------------------------------|----------------|-------------|-------------|-------------|-------------|-------|
| Mean percent SBP reduction, %   | 28 ± 16        | 31 ± 18     | 26 ± 15     | 28 ± 15     | 29 ± 16     | 0.104 |
| Mean percent MAP reduction, %   | 27 ± 16        | 32 ± 19     | 26 ± 16     | 29 ± 15     | 28 ± 16     | 0.257 |
| Mean ΔSBP, mmHg ± SD            | 37 ± 34        | 46 ± 38     | 33 ± 32     | 41 ± 36     | 41 ± 32     | 0.035 |
| Mean ΔMAP, mmHg ± SD            | 26 ± 23        | 31 ± 25     | 24 ± 23     | 26 ± 25     | 28 ± 21     | 0.177 |
| Mean percent ΔSBP, %            | 23 ± 20        | 28 ± 21     | 20 ± 20     | 24 ± 20     | 26 ± 20     | 0.065 |
| Mean percent ΔMAP, %            | 22 ± 20        | 28 ± 21     | 21 ± 20     | 21 ± 20     | 25 ± 18     | 0.103 |
| SBP hypotensive area, mm Hg-min | 592 (118-1968) | 2045 ± 3026 | 1219 ± 1766 | 1909 ± 3321 | 1591 ± 1559 | 0.041 |
| MAP hypotensive area, mm Hg-min | 409 (58-1431)  | 1338 ± 1884 | 955 ± 1520  | 1210 ± 2107 | 1124 ± 1185 | 0.433 |

**Table II: Hemodynamic variables and site of occlusion.** MAP, mean arterial pressure; ΔMAP, difference between baseline and lowest MAP during endovascular thrombectomy; aMAP, area between baseline and intraprocedural MAP; SBP, systolic blood pressure; ΔSBP, difference between baseline and lowest SBP during endovascular thrombectomy; aSBP, area between baseline and intraprocedural SBP.

| <b>Table III. Likelihood of a shift towards worse outcome on 90-day mRS</b> |      |           |         |      |           |         |
|-----------------------------------------------------------------------------|------|-----------|---------|------|-----------|---------|
| Variables                                                                   | OR   | 95% CI    | p Value | aOR  | 95% CI    | p Value |
| ΔMAP, per 10 mmHg                                                           | 1.21 | 1.08-1.35 | 0.001   | 1.19 | 1.03-1.38 | 0.015   |
| ΔSBP, per 10 mmHg                                                           | 1.16 | 1.08-1.26 | <0.001  | 1.15 | 1.06-1.26 | 0.002   |
| aMAP, per 300 mmHg*min                                                      | 1.14 | 1.06-1.23 | <0.001  | 1.15 | 1.06-1.24 | 0.001   |
| aSBP, per 300 mmHg*min                                                      | 1.12 | 1.05-1.19 | <0.001  | 1.09 | 1.03-1.14 | 0.002   |

**Table III: Association of hemodynamic variables with functional outcome for the subpopulation of reperfused patients (TICI 2B or 3).** OR, odds ratio; aOR, adjusted OR (adjusted for age, ASPECT score, baseline blood pressure, admission NIHSS, TICI score, and time-to-reperfusion); mRS, modified Rankin scale; MAP, mean arterial pressure; ΔMAP, difference between baseline and lowest MAP during endovascular thrombectomy; aMAP, area between baseline and intraprocedural MAP; SBP, systolic blood pressure; ΔSBP, difference between baseline and lowest SBP during endovascular thrombectomy; aSBP, area between baseline and intraprocedural SBP.

**Table IV. Association of hemodynamic variables with functional outcome after adjusting for initial core volume (CBF<30%)**

| <b>Likelihood of a shift towards worse outcome on discharge mRS</b> |              |           |            |                  |
|---------------------------------------------------------------------|--------------|-----------|------------|------------------|
| Variables                                                           | aOR          | 95% CI    | p Value    |                  |
| ΔMAP, per 10-mmHg                                                   | 1.24         | 1.04-1.48 | 0.015      |                  |
| ΔSBP, per 10-mmHg                                                   | 1.17         | 1.05-1.31 | 0.006      |                  |
| aMAP, per 300-mmHg*min                                              | 1.14         | 1.03-1.25 | 0.011      |                  |
| aSBP, per 300-mmHg*min                                              | 1.08         | 1.01-1.15 | 0.019      |                  |
| <b>Likelihood of a shift towards worse outcome on 90-day mRS</b>    |              |           |            |                  |
| Variables                                                           | aOR          | 95% CI    | p Value    |                  |
| ΔMAP, per 10-mmHg                                                   | 1.29         | 1.09-1.54 | 0.003      |                  |
| ΔSBP, per 10-mmHg                                                   | 1.20         | 1.07-1.35 | 0.002      |                  |
| aMAP, per 300-mmHg*min                                              | 1.17         | 1.05-1.30 | 0.003      |                  |
| aSBP, per 300-mmHg*min                                              | 1.12         | 1.04-1.20 | 0.002      |                  |
| <b>Relationship with final infarct volume (mL)</b>                  |              |           |            |                  |
|                                                                     | unadjusted B | p-value   | adjusted B | Adjusted p-value |
| ΔMAP, per 10-mmHg                                                   | 5.5          | 0.003     | 4.1        | 0.035            |
| ΔSBP, per 10-mmHg                                                   | 3.5          | 0.006     | 2.4        | 0.049            |
| aMAP, per 300- mmHg*min                                             | 2.5          | 0.005     | 1.2        | 0.276            |
| aSBP, per 300- mmHg*min                                             | 1.9          | 0.003     | 0.8        | 0.331            |
| <b>Relationship with infarct growth (mL)</b>                        |              |           |            |                  |
| ΔMAP, per 10-mmHg                                                   | 4.5          | 0.038     | 4.1        | 0.036            |
| ΔSBP, per 10-mmHg                                                   | 3            | 0.033     | 2.4        | 0.057            |
| aMAP, per 300- mmHg*min                                             | 2.7          | 0.033     | 1.3        | 0.261            |
| aSBP, per 300- mmHg*min                                             | 1.83         | 0.024     | 0.8        | 0.337            |

**Table IV: Association of hemodynamic variables with functional outcome after adjusting for initial core volume (CBF<30%).** aOR, adjusted odds ratio (adjusted for age, core infarct volume (CBF<30%), baseline blood pressure, admission NIHSS, TICI score, and time-to-reperfusion); MAP, mean arterial pressure; mRS, modified Rankin scale; ΔMAP, difference between baseline and lowest MAP during endovascular thrombectomy; aMAP, area between baseline and intraprocedural MAP, SBP, systolic blood pressure; ΔSBP, difference between baseline and lowest SBP during endovascular thrombectomy; aSBP, area between baseline and intraprocedural SBP; final infarct volume analysis was adjusted for age, core infarct volume (CBF<30%), site of vessel occlusion, admission NIHSS, and TICI score.; infarct growth analysis was adjusted for age, site of vessel occlusion, admission NIHSS, and TICI score.

| <b>Table V. Baseline Patient Characteristics by Institution</b> |              |                                  |                           |                |
|-----------------------------------------------------------------|--------------|----------------------------------|---------------------------|----------------|
|                                                                 |              | <b>Yale – New Haven Hospital</b> | <b>University of Iowa</b> | <b>p-value</b> |
| Total patients                                                  | 390          | 237 (61)                         | 153 (39)                  |                |
| Age, mean ± SD                                                  | 71 ± 14      | 72 ± 14                          | 69 ± 15                   | 0.095          |
| Gender, F (%)                                                   | 219 (56)     | 137 (58)                         | 82 (54)                   | 0.413          |
| Race, n (%)                                                     |              |                                  |                           | 0.000          |
| White                                                           | 326 (84)     | 181 (76)                         | 145 (95)                  |                |
| Black or African American                                       | 37 (9)       | 33 (14)                          | 4 (3)                     |                |
| Asian                                                           | 4 (1)        | 4 (2)                            | 0 (0)                     |                |
| Other                                                           | 20 (5)       | 16 (7)                           | 4 (3)                     |                |
| Medical History*, n (%)                                         |              |                                  |                           |                |
| Hypertension                                                    | 238 (61)     | 161 (68)                         | 77 (50)                   | 0.000          |
| Coronary artery disease/myocardial infarction                   | 73 (19)      | 47 (20)                          | 26 (17)                   | 0.483          |
| Hyperlipidemia                                                  | 143 (37)     | 101 (43)                         | 42 (28)                   | 0.002          |
| Chronic heart failure                                           | 45 (12)      | 32 (14)                          | 13 (9)                    | 0.131          |
| Atrial fibrillation                                             | 137 (35)     | 88 (37)                          | 49 (32)                   | 0.302          |
| Diabetes mellitus                                               | 83 (21)      | 52 (22)                          | 31 (20)                   | 0.692          |
| Past ischemic stroke                                            | 41 (11)      | 24 (10)                          | 17 (11)                   | 0.757          |
| Current/past smoker                                             | 93 (24)      | 75 (32)                          | 18 (12)                   | 0.000          |
| Occlusion on CTA*, n (%)                                        |              |                                  |                           | 0.036          |
| ICA/tICA                                                        | 81 (18)      | 44 (19)                          | 37 (24)                   |                |
| ACA                                                             | 7 (2)        | 7 (3)                            | 0 (0)                     |                |
| M1 MCA                                                          | 282 (63)     | 161 (68)                         | 121 (79)                  |                |
| M2 MCA                                                          | 79 (18)      | 60 (25)                          | 19 (12)                   |                |
| Admission NIHSS, mean ± SD                                      | 17 ± 6       | 17 ± 6                           | 16 ± 6                    | 0.613          |
| Admission MAP, mean ± SD                                        | 105 ± 18     | 106 ± 19                         | 104 ± 17                  | 0.327          |
| ASPECTS, median (IQR)                                           | 9 (7-10)     | 9 (7-10)                         | 8 (7-10)                  | 0.080          |
| Core infarct volume, median (IQR)                               | 6.5 (0-25.8) | 0 (0-20)                         | 12 (0-29)                 | 0.008          |
| Treated with tPA, n (%)                                         | 227 (58)     | 122 (52)                         | 105 (69)                  | 0.001          |
| Mean onset to bolus time, minutes ± SD                          | 138 ± 74     | 140 ± 83                         | 135 ± 60                  | 0.896          |
| Mean onset to admission, minutes ± SD                           | 304 ± 291    | 303 ± 290                        | 297 ± 276                 | 0.338          |
| Mean onset to EVT, minutes ± SD                                 | 404 ± 345    | 393 ± 325                        | 409 ± 337                 | 0.020          |
| Mean onset to reperfusion, minutes ± SD                         | 463 ± 266    | 464 ± 278                        | 460 ± 249                 | 0.510          |
| TICI, n (%)                                                     |              |                                  |                           | 0.000          |
| 0                                                               | 60 (15)      | 49 (20)                          | 11 (7)                    |                |
| 1                                                               | 8 (2)        | 5 (2)                            | 3 (2)                     |                |
| 2A                                                              | 34 (9)       | 14 (6)                           | 20 (13)                   |                |
| 2B                                                              | 160 (41)     | 99 (42)                          | 61 (40)                   |                |
| 3                                                               | 120 (31)     | 63 (27)                          | 57 (37)                   |                |

**Table V: Baseline patient characteristics by institution.** SD, standard deviation; F, female; CTA, computed tomography angiography; ICA, internal carotid artery; tICA, terminal internal carotid artery; ACA, anterior cerebral artery; MCA, middle cerebral artery; MAP, mean arterial pressure; EVT, endovascular thrombectomy.

| <b>Table VI. Hemodynamic variables and anesthesia</b>                                     |                |           |         |                           |                                  |                |
|-------------------------------------------------------------------------------------------|----------------|-----------|---------|---------------------------|----------------------------------|----------------|
| <b>Hemodynamic variables by type of anesthesia</b>                                        |                |           |         |                           |                                  |                |
|                                                                                           |                |           |         | <b>General Anesthesia</b> | <b>Monitored Anesthesia Care</b> | <b>p-value</b> |
| Total patients                                                                            | 390            |           |         | 140                       | 250                              |                |
| Mean $\Delta$ SBP, mmHg $\pm$ SD                                                          | 37 $\pm$ 34    |           |         | 49 $\pm$ 29               | 30 $\pm$ 34                      | <0.001         |
| Mean $\Delta$ MAP, mmHg $\pm$ SD                                                          | 26 $\pm$ 23    |           |         | 35 $\pm$ 20               | 20 $\pm$ 23                      | <0.001         |
| SBP hypotensive area, mmHg*min                                                            | 592 (118-1968) |           |         | 1101 (402-2654)           | 371 (44-1699)                    | <0.001         |
| MAP hypotensive area, mmHg*min                                                            | 409 (58-1431)  |           |         | 984 (227-1968)            | 225 (20-1057)                    | <0.001         |
| <b>Association of hemodynamic variables with functional outcome by type of anesthesia</b> |                |           |         |                           |                                  |                |
| <b>Monitored Anesthesia Care</b>                                                          |                |           |         |                           |                                  |                |
| <b>Likelihood of a shift towards worse outcome on discharge mRS</b>                       |                |           |         |                           |                                  |                |
| Variables                                                                                 | OR             | 95% CI    | p Value | aOR                       | 95% CI                           | p Value        |
| $\Delta$ MAP, per 10-mmHg                                                                 | 1.12           | 1.01-1.23 | 0.023   | 1.06                      | 0.96-1.17                        | 0.279          |
| aMAP, per 300-mmHg*min                                                                    | 1.08           | 1.02-1.13 | 0.004   | 1.05                      | 1.00-1.11                        | 0.061          |
| <b>Likelihood of a shift towards worse outcome on 90-day mRS</b>                          |                |           |         |                           |                                  |                |
| Variables                                                                                 | OR             | 95% CI    | p Value | aOR                       | 95% CI                           | p Value        |
| $\Delta$ MAP, per 10-mmHg                                                                 | 1.20           | 1.07-1.34 | 0.002   | 1.16                      | 1.04-1.31                        | 0.011          |
| aMAP, per 300-mmHg*min                                                                    | 1.14           | 1.06-1.23 | <0.001  | 1.13                      | 1.04-1.22                        | 0.003          |
| <b>General Anesthesia</b>                                                                 |                |           |         |                           |                                  |                |
| <b>Likelihood of a shift towards worse outcome on discharge mRS</b>                       |                |           |         |                           |                                  |                |
| Variables                                                                                 | OR             | 95% CI    | p Value | aOR                       | 95% CI                           | p Value        |
| $\Delta$ MAP, per 10-mmHg                                                                 | 1.31           | 1.11-1.53 | 0.001   | 1.22                      | 1.04-1.44                        | 0.017          |
| aMAP, per 300-mmHg*min                                                                    | 1.15           | 1.07-1.23 | <0.001  | 1.12                      | 1.04-1.20                        | 0.004          |
| <b>Likelihood of a shift towards worse outcome on 90-day mRS</b>                          |                |           |         |                           |                                  |                |
| Variables                                                                                 | OR             | 95% CI    | p Value | aOR                       | 95% CI                           | p Value        |
| $\Delta$ MAP, per 10-mmHg                                                                 | 1.24           | 1.05-1.46 | 0.013   | 1.13                      | 0.95-1.35                        | 0.154          |
| aMAP, per 300-mmHg*min                                                                    | 1.14           | 1.06-1.23 | 0.001   | 1.11                      | 1.02-1.21                        | 0.015          |

**Table VI: Hemodynamic variables and anesthesia.** OR, odds ratio; aOR, adjusted odds ratio (adjusted for age, admission NIHSS, and TIC1 score); MAP, mean arterial pressure; SBP,

systolic blood pressure; mRS, modified Rankin scale;  $\Delta$ MAP, difference between baseline and lowest MAP during endovascular thrombectomy; aMAP, area between baseline and intraprocedural MAP,  $\Delta$ SBP, difference between baseline and lowest SBP during endovascular thrombectomy; aSBP, area between baseline and intraprocedural SBP.

| <b>Table VII. Association of hemodynamic variables with functional outcome for procedural blood pressure baseline</b> |      |           |         |      |           |         |
|-----------------------------------------------------------------------------------------------------------------------|------|-----------|---------|------|-----------|---------|
| <b>Likelihood of a shift towards worse outcome on discharge mRS</b>                                                   |      |           |         |      |           |         |
| Variables                                                                                                             | OR   | 95% CI    | p Value | aOR  | 95% CI    | p Value |
| $\Delta$ MAP_proc, per 10-mmHg                                                                                        | 1.15 | 1.07-1.25 | <0.001  | 1.07 | 0.98-1.18 | 0.133   |
| $\Delta$ SBP_proc, per 10-mmHg                                                                                        | 1.11 | 1.05-1.18 | <0.001  | 1.07 | 1.00-1.14 | 0.040   |
| aMAP_proc, per 300-mmHg*min                                                                                           | 1.08 | 1.04-1.11 | <0.001  | 1.04 | 1.00-1.09 | 0.033   |
| aSBP_proc, per 300-mmHg*min                                                                                           | 1.05 | 1.03-1.07 | <0.001  | 1.03 | 1.00-1.05 | 0.050   |
| <b>Likelihood of a shift towards worse outcome on 90-day mRS</b>                                                      |      |           |         |      |           |         |
| Variables                                                                                                             | OR   | 95% CI    | p Value | aOR  | 95% CI    | p Value |
| $\Delta$ MAP_proc, per 10-mmHg                                                                                        | 1.13 | 1.04-1.24 | 0.005   | 1.06 | 0.95-1.18 | 0.253   |
| $\Delta$ SBP_proc, per 10-mmHg                                                                                        | 1.10 | 1.04-1.17 | 0.001   | 1.07 | 1.00-1.15 | 0.054   |
| aMAP_proc, per 300-mmHg*min                                                                                           | 1.08 | 1.04-1.12 | <0.001  | 1.06 | 1.01-1.11 | 0.014   |
| aSBP_proc, per 300-mmHg*min                                                                                           | 1.06 | 1.03-1.09 | <0.001  | 1.05 | 1.02-1.08 | 0.003   |

**Table VII: Association of hemodynamic variables with functional outcome for procedural baseline.** OR, odds ratio; aOR, adjusted odds ratio (adjusted for age, ASPECTS, baseline blood pressure, admission NIHSS, TICI score, and time-to-reperfusion); MAP, mean arterial pressure; mRS, modified Rankin scale;  $\Delta$ MAP\_proc, difference between baseline BP at arrival in the angiosuite and lowest MAP during endovascular thrombectomy; aMAP\_proc, area between baseline BP at arrival in the angiosuite and intraprocedural MAP; SBP, systolic blood pressure;  $\Delta$ SBP\_proc, difference between baseline BP at arrival in the angiosuite and lowest SBP during endovascular thrombectomy; aSBP\_proc, area between baseline BP at arrival in the angiosuite and intraprocedural SBP.



|                                | <b>Admission</b> | <b>Procedural</b> | <b>p-value</b> |
|--------------------------------|------------------|-------------------|----------------|
| Total patients                 | 390              | 390               |                |
| Mean Baseline MAP, mmHg±SD     | 106±19           | 114±21            | <0.001         |
| Mean Baseline SBP, mmHg±SD     | 149±26           | 161±31            | <0.001         |
| Mean ΔSBP, mmHg±SD             | 37±34            | 48±34             | <0.001         |
| Mean ΔMAP, mmHg±SD             | 26±23            | 35±23             | <0.001         |
| SBP hypotensive area, mmHg*min | 592 (118-1968)   | 1132 (371-2786)   | <0.001         |
| MAP hypotensive area, mmHg*min | 409 (58-1431)    | 784 (276-2090)    | <0.001         |

**Table VIII: Comparison of hemodynamic variables using admission and pre-procedural blood pressure baseline.** ΔMAP, difference between baseline and lowest MAP during endovascular thrombectomy; aMAP, area between baseline and intraprocedural MAP; SBP, systolic blood pressure; ΔSBP, difference between baseline and lowest SBP during endovascular thrombectomy; aSBP, area between baseline and intraprocedural SBP.

|                                               | <b>Patients with 3-month follow-up</b> | <b>Patients without 3-month follow-up</b> | <b>p-value</b> |
|-----------------------------------------------|----------------------------------------|-------------------------------------------|----------------|
| Total patients                                | 294                                    | 96                                        |                |
| Age, mean ± SD                                | 72 ± 14                                | 70 ± 15                                   | 0.310          |
| Gender, F (%)                                 | 164 (56)                               | 55 (57)                                   | 0.796          |
| Race, n (%)                                   |                                        |                                           | <0.001         |
| White                                         | 264 (90)                               | 62 (65)                                   |                |
| Black or African American                     | 15 (5)                                 | 22 (23)                                   |                |
| Asian                                         | 4 (1)                                  | 0 (0)                                     |                |
| Other                                         | 11 (4)                                 | 9 (9)                                     |                |
| Medical History*, n (%)                       |                                        |                                           |                |
| Hypertension                                  | 176 (60)                               | 62 (65)                                   | 0.410          |
| Coronary artery disease/myocardial infarction | 53 (18)                                | 20 (21)                                   | 0.541          |
| Hyperlipidemia                                | 109 (37)                               | 34 (35)                                   | 0.770          |
| Chronic heart failure                         | 33 (11)                                | 12 (13)                                   | 0.734          |
| Atrial fibrillation                           | 105 (36)                               | 32 (33)                                   | 0.671          |
| Diabetes mellitus                             | 62 (21)                                | 21 (22)                                   | 0.870          |
| Past ischemic stroke                          | 33 (11)                                | 8 (8)                                     | 0.423          |
| Current/past smoker                           | 63 (21)                                | 30 (31)                                   | 0.050          |
| Occlusion on CTA*, n (%)                      |                                        |                                           | 0.015          |
| ICA/tICA                                      | 69 (23)                                | 12 (13)                                   |                |
| ACA                                           | 6 (2)                                  | 1(1)                                      |                |
| M1 MCA                                        | 219 (74)                               | 63 (66)                                   |                |
| M2 MCA                                        | 48 (16)                                | 31 (32)                                   |                |
| Admission NIHSS, mean ± SD                    | 17 ± 6                                 | 17 ± 6                                    | 0.817          |
| Admission MAP, mean ± SD                      | 105 ± 18                               | 107 ± 19                                  | 0.369          |

|                                             |               |               |       |
|---------------------------------------------|---------------|---------------|-------|
| ASPECTS, median (IQR)                       | 8.5 (7-10)    | 9 (7-10)      | 0.433 |
| Treated with tPA, n (%)                     | 176 (60)      | 51 (53)       | 0.245 |
| Mean onset to bolus time, minutes $\pm$ SD  | 142 $\pm$ 80  | 126 $\pm$ 50  | 0.364 |
| Mean onset to admission, minutes $\pm$ SD   | 302 $\pm$ 288 | 297 $\pm$ 274 | 0.533 |
| Mean onset to EVT, minutes $\pm$ SD         | 403 $\pm$ 338 | 389 $\pm$ 305 | 0.302 |
| Mean onset to reperfusion, minutes $\pm$ SD | 460 $\pm$ 262 | 471 $\pm$ 282 | 0.883 |
| TICI, n (%)                                 |               |               | 0.112 |
| 0                                           | 39 (13)       | 21 (22)       |       |
| 1                                           | 7 (2)         | 1 (1)         |       |
| 2A                                          | 30 (10)       | 4 (4)         |       |
| 2B                                          | 121 (41)      | 39 (41)       |       |
| 3                                           | 93 (32)       | 27 (28)       |       |

**Table IX: Comparison of patients with and without 90-day follow-up.** SD, standard deviation; F, female; CTA, computed tomography angiography; ICA, internal carotid artery; tICA, terminal internal carotid artery; ACA, anterior cerebral artery; MCA, middle cerebral artery; MAP, mean arterial pressure; EVT, endovascular thrombectomy.

| <b>Table X. Hemodynamic variables and associations by BP measurement type</b> |                |           |         |                |                |                |
|-------------------------------------------------------------------------------|----------------|-----------|---------|----------------|----------------|----------------|
|                                                                               |                |           |         | <b>A-line</b>  | <b>BP Cuff</b> | <b>p-value</b> |
| Total patients                                                                | 390            |           |         | 236            | 154            |                |
| Mean $\Delta$ SBP, mmHg $\pm$ SD                                              | 37 $\pm$ 34    |           |         | 41 $\pm$ 34    | 30 $\pm$ 32    | 0.001          |
| Mean $\Delta$ MAP, mmHg $\pm$ SD                                              | 26 $\pm$ 23    |           |         | 29 $\pm$ 23    | 20 $\pm$ 23    | <0.001         |
| SBP hypotensive area, mmHg*min                                                | 592 (118-1968) |           |         | 575 (143-1932) | 672 (56-2162)  | 0.990          |
| MAP hypotensive area, mmHg*min                                                | 409 (58-1431)  |           |         | 413 (87-1505)  | 374 (34-1398)  | 0.378          |
| <b>Arterial Line</b>                                                          |                |           |         |                |                |                |
| <b>Likelihood of a shift towards worse outcome on discharge mRS</b>           |                |           |         |                |                |                |
| Variables                                                                     | OR             | 95% CI    | p Value | aOR            | 95% CI         | p Value        |
| $\Delta$ MAP, per 10-mmHg                                                     | 1.24           | 1.12-1.38 | <0.001  | 1.27           | 1.08-1.5       | 0.004          |
| $\Delta$ SBP, per 10-mmHg                                                     | 1.19           | 1.11-1.28 | <0.001  | 1.16           | 1.04-1.29      | 0.006          |
| aMAP, per 300-mmHg*min                                                        | 1.16           | 1.09-1.23 | <0.001  | 1.13           | 1.03-1.23      | 0.007          |
| aSBP, per 300-mmHg*min                                                        | 1.12           | 1.07-1.17 | <0.001  | 1.07           | 1-1.14         | 0.048          |
| <b>Likelihood of a shift towards worse outcome on 90-day mRS</b>              |                |           |         |                |                |                |
| Variables                                                                     | OR             | 95% CI    | p Value | aOR            | 95% CI         | p Value        |
| $\Delta$ MAP, per 10-mmHg                                                     | 1.28           | 1.14-1.43 | <0.001  | 1.32           | 1.11-1.55      | 0.001          |

|                                                                     |      |           |         |      |           |         |
|---------------------------------------------------------------------|------|-----------|---------|------|-----------|---------|
| ΔSBP, per 10-mmHg                                                   | 1.21 | 1.12-1.31 | <0.001  | 1.19 | 1.07-1.33 | 0.002   |
| aMAP, per 300-mmHg*min                                              | 1.18 | 1.10-1.26 | <0.001  | 1.15 | 1.04-1.27 | 0.006   |
| aSBP, per 300-mmHg*min                                              | 1.13 | 1.08-1.20 | <0.001  | 1.1  | 1.02-1.18 | 0.019   |
| <b>Non-Invasive Blood Pressure Cuff</b>                             |      |           |         |      |           |         |
| <b>Likelihood of a shift towards worse outcome on discharge mRS</b> |      |           |         |      |           |         |
| Variables                                                           | OR   | 95% CI    | p Value | aOR  | 95% CI    | p Value |
| ΔMAP, per 10-mmHg                                                   | 1.16 | 1.03-1.32 | 0.018   | 1.12 | 0.92-1.37 | 0.273   |
| ΔSBP, per 10-mmHg                                                   | 1.14 | 1.04-1.25 | 0.005   | 1.09 | 0.95-1.26 | 0.199   |
| aMAP, per 300-mmHg*min                                              | 1.07 | 1.01-1.13 | 0.022   | 1    | 0.99-1.35 | 0.075   |
| aSBP, per 300-mmHg*min                                              | 1.05 | 1.01-1.10 | 0.009   | 1    | 0.99-1    | 0.091   |
| <b>Likelihood of a shift towards worse outcome on 90-day mRS</b>    |      |           |         |      |           |         |
| Variables                                                           | OR   | 95% CI    | p Value | aOR  | 95% CI    | p Value |
| ΔMAP, per 10-mmHg                                                   | 1.23 | 1.04-1.44 | 0.014   | 1.31 | 1-1.7     | 0.047   |
| ΔSBP, per 10-mmHg                                                   | 1.18 | 1.05-1.32 | 0.007   | 1.19 | 0.99-1.42 | 0.065   |
| aMAP, per 300-mmHg*min                                              | 1.10 | 1.01-1.20 | 0.025   | 1.13 | 0.99-1.3  | 0.069   |
| aSBP, per 300-mmHg*min                                              | 1.06 | 1.00-1.11 | 0.041   | 1.06 | 0.98-1.14 | 0.174   |

**Table X. Hemodynamic variables and associations by BP measurement type.** aOR, adjusted odds ratio (adjusted for age, ASPECTS, baseline blood pressure, admission NIHSS, TICI score, and time-to-reperfusion); OR, odds ratio; MAP, mean arterial pressure; mRS, modified Rankin scale; ΔMAP, difference between baseline and lowest MAP during endovascular thrombectomy; aMAP, area between baseline and intraprocedural MAP; SBP, systolic blood pressure; ΔSBP, difference between baseline and lowest SBP during endovascular thrombectomy; aSBP, area between baseline and intraprocedural SBP.
